# Supplementary material for: A boron-dipyrrin–mercury(ii) complex as a fluorescence turn-on sensor for chloride and applications towards logic gates
Source: Royal Society of Chemistry journal article supplement (doi:10.1039/c3tc32188f), 2014-01-01
Supplement: c3tc32188f.pdf [file c3tc32188f.pdf]

## Boron-Dipyrrin-Mercury(II) Complex as Fluorescence Turn-On Sensor for Chloride and Applications Towards Logic Gates

Sheri Madhu<sup>1</sup>, Kalaiyarasi R<sup>1</sup>, Santanu Kumar Basu<sup>2</sup>, Sameer Jadhav<sup>2</sup>, and  
Mangalampalli Ravikanth<sup>1,\*</sup>

Department of <sup>1</sup>Chemistry and <sup>2</sup>Chemical Engineering, Indian Institute of Technology  
Bombay, Powai, Mumbai 400 076, India. E-mail: [ravikanth@chem.iitb.ac.in](mailto:ravikanth@chem.iitb.ac.in)

| Entry | Contents                                                                                      | Page no |
|-------|-----------------------------------------------------------------------------------------------|---------|
| 1     | <b>Figure S1.</b> HRMS spectrum of compound <b>1</b>                                          | 3       |
| 2     | <b>Figure S2.</b> <sup>1</sup> H NMR spectrum of compound <b>1</b>                            | 4       |
| 3     | <b>Figure S3.</b> <sup>13</sup> C NMR spectrum of compound <b>1</b>                           | 5       |
| 4     | <b>Figure S4.</b> <sup>11</sup> B NMR spectrum of compound <b>1</b>                           | 6       |
| 5     | <b>Figure S5.</b> <sup>19</sup> F NMR spectrum of compound <b>1</b>                           | 7       |
| 6     | <b>Figure S6.</b> HRMS spectrum of compound <b>2</b>                                          | 8       |
| 7     | <b>Figure S7.</b> <sup>1</sup> H NMR spectrum of compound <b>2</b>                            | 9       |
| 8     | <b>Figure S8.</b> <sup>13</sup> C NMR spectrum of compound <b>2</b>                           | 10      |
| 9     | <b>Figure S9.</b> <sup>11</sup> B NMR spectrum of compound <b>2</b>                           | 11      |
| 10    | <b>Figure S10.</b> <sup>19</sup> F NMR spectrum of compound <b>2</b>                          | 12      |
| 11    | <b>Figure S11.</b> Comparison of <sup>1</sup> H NMR spectra of BODIPYs <b>1</b> and <b>2</b>  | 13      |
| 12    | <b>Figure S12.</b> Crystal structure of compound <b>1</b>                                     | 14      |
| 13    | <b>Figure S13.</b> Absorption spectra of <b>1</b> in different solvents                       | 15      |
| 14    | <b>Figure S14.</b> Emission spectra of <b>1</b> in different solvents                         | 16      |
| 15    | <b>Figure S15.</b> Absorption spectra of <b>2</b> in different solvents                       | 17      |
| 16    | <b>Figure S16.</b> Emission spectra of <b>2</b> in different solvents                         | 18      |
| 17    | <b>Figure S17.</b> Color change of <b>1</b> to various metal ions (under daylight)            | 19      |
| 18    | <b>Figure S18.</b> Color change of <b>1</b> to various metal ions (under UV lamp)             | 19      |
| 19    | <b>Figure S19.</b> <sup>1</sup> H NMR titration spectra of <b>1</b> with Hg <sup>2+</sup> ion | 20      |
| 20    | <b>Figure S20.</b> HRMS spectrum of <b>1</b> -Hg <sup>2+</sup> complex                        | 21      |
| 21    | <b>Figure S21.</b> Calculated isotopic pattern for <b>1</b> -Hg <sup>2+</sup> complex         | 22      |
| 22    | <b>Figure S22.</b> ESI-MS spectrum <b>2</b> -Hg <sup>2+</sup> complex                         | 23      |
| 23    | <b>Figure S23.</b> Job's plot for complex formed between <b>1</b> and Hg <sup>2+</sup>        | 24      |
| 24    | <b>Figure S24.</b> Stern-Volmer plot for <b>1</b> with Hg <sup>2+</sup>                       | 25      |

|    |                                                                                                                    |           |
|----|--------------------------------------------------------------------------------------------------------------------|-----------|
| 25 | <b>Figure S25.</b> Stern-Volmer plot for <b>2</b> with $\text{Hg}^{2+}$                                            | <b>26</b> |
| 26 | <b>Figure S26.</b> Color change of <b>1</b> - $\text{Hg}^{2+}$ to anions (under daylight)                          | <b>27</b> |
| 27 | <b>Figure S27.</b> Color change of <b>1</b> - $\text{Hg}^{2+}$ to anions (under UV lamp)                           | <b>27</b> |
| 28 | <b>Figure S28.</b> Competitive anions study of <b>1</b> - $\text{Hg}^{2+}$ , <b>2</b> - $\text{Hg}^{2+}$ complexes | <b>28</b> |
| 29 | <b>Figure S29.</b> HRMS of <b>1</b> obtained from <b>1</b> - $\text{Hg}^{2+}$ complex with $\text{Cl}^-$           | <b>29</b> |
| 30 | <b>Figure S30.</b> HRMS of <b>2</b> obtained from <b>2</b> - $\text{Hg}^{2+}$ complex with $\text{Cl}^-$           | <b>30</b> |
| 31 | <b>Figure S31.</b> Fluorescence decay profiles of <b>1</b> - $\text{Hg}^{2+}$ complex with $\text{Cl}^-$           | <b>31</b> |
| 32 | <b>Figure S32.</b> Detection limit plot of $\text{Cl}^-$ for <b>1</b> - $\text{Hg}^{2+}$                           | <b>32</b> |
| 33 | <b>Figure S33.</b> Detection limit plot of $\text{Cl}^-$ for <b>2</b> - $\text{Hg}^{2+}$                           | <b>33</b> |
| 34 | <b>Table S1.</b> Electrochemical data of compounds <b>1-4</b>                                                      | <b>34</b> |

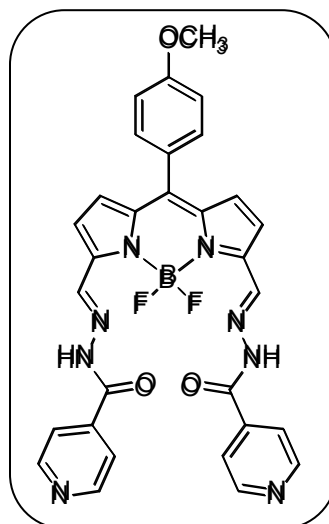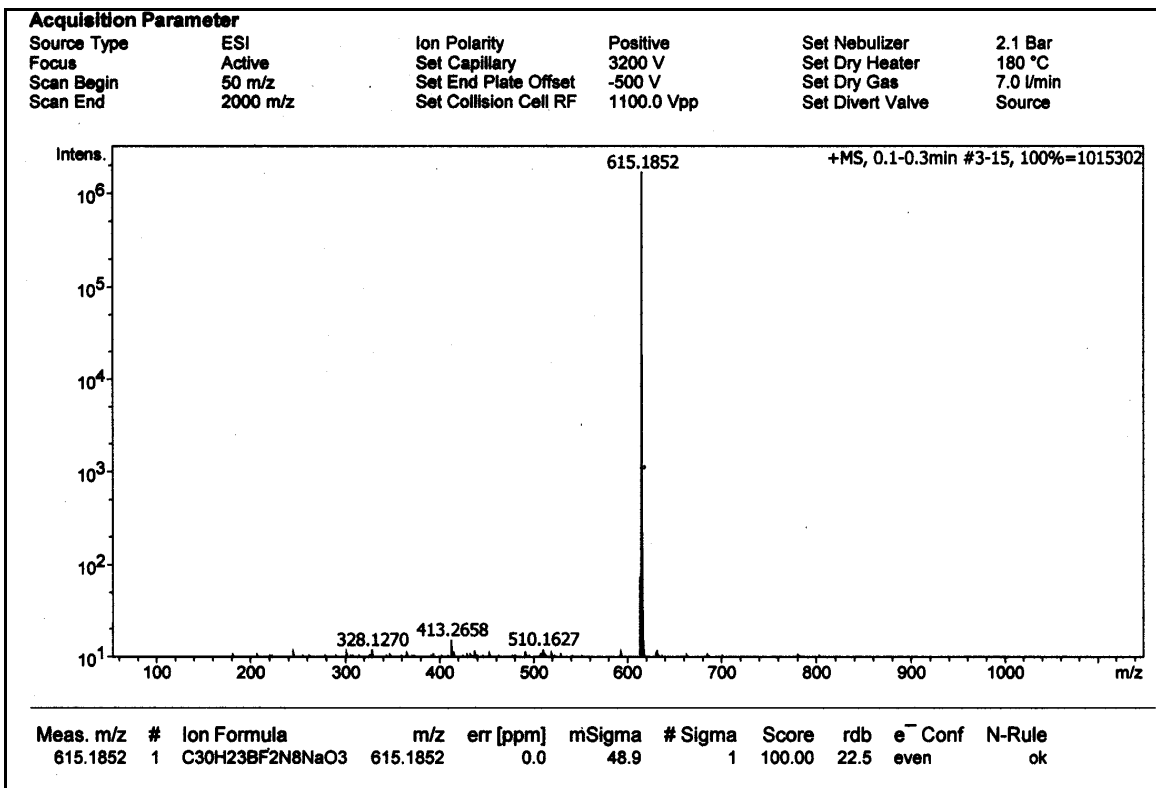

Figure S1: HRMS spectrum of compound 1

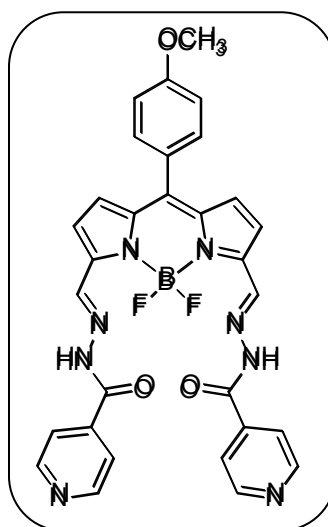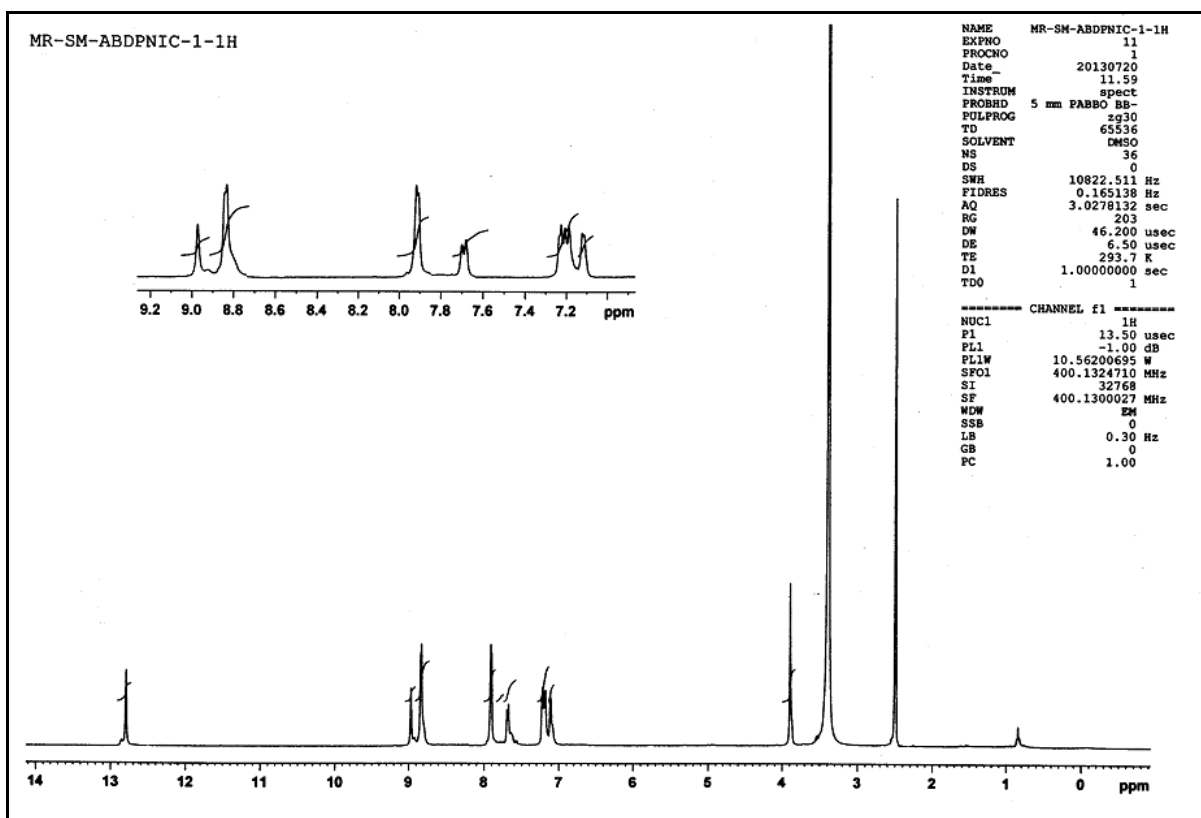

Figure S2: <sup>1</sup>H NMR spectrum of compound 1 recorded in DMSO-d<sub>6</sub>

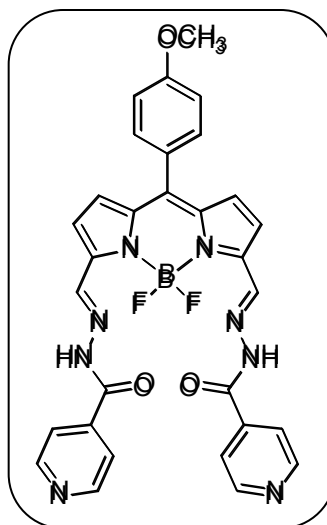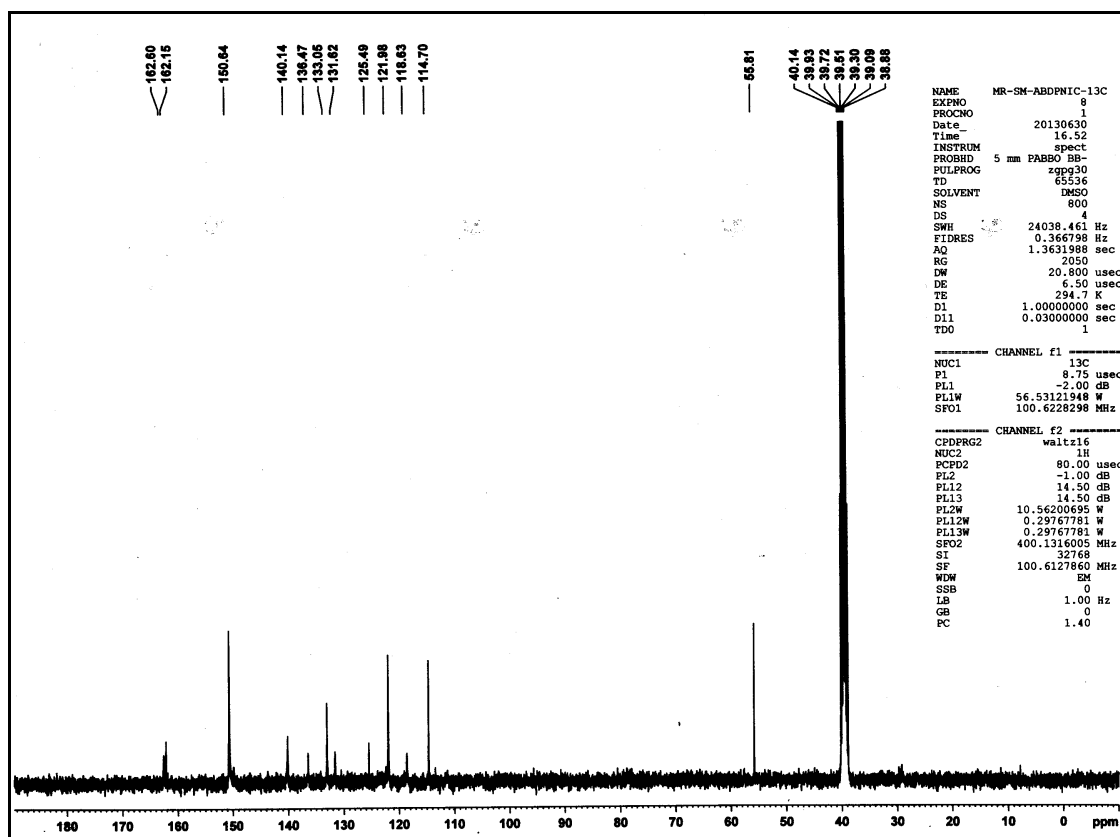

Figure S3:  $^{13}\text{C}$  NMR spectrum of compound 1 recorded in  $\text{DMSO-d}_6$

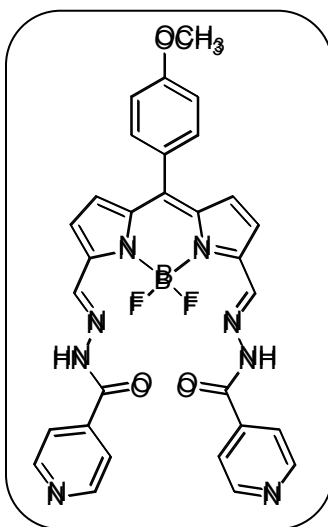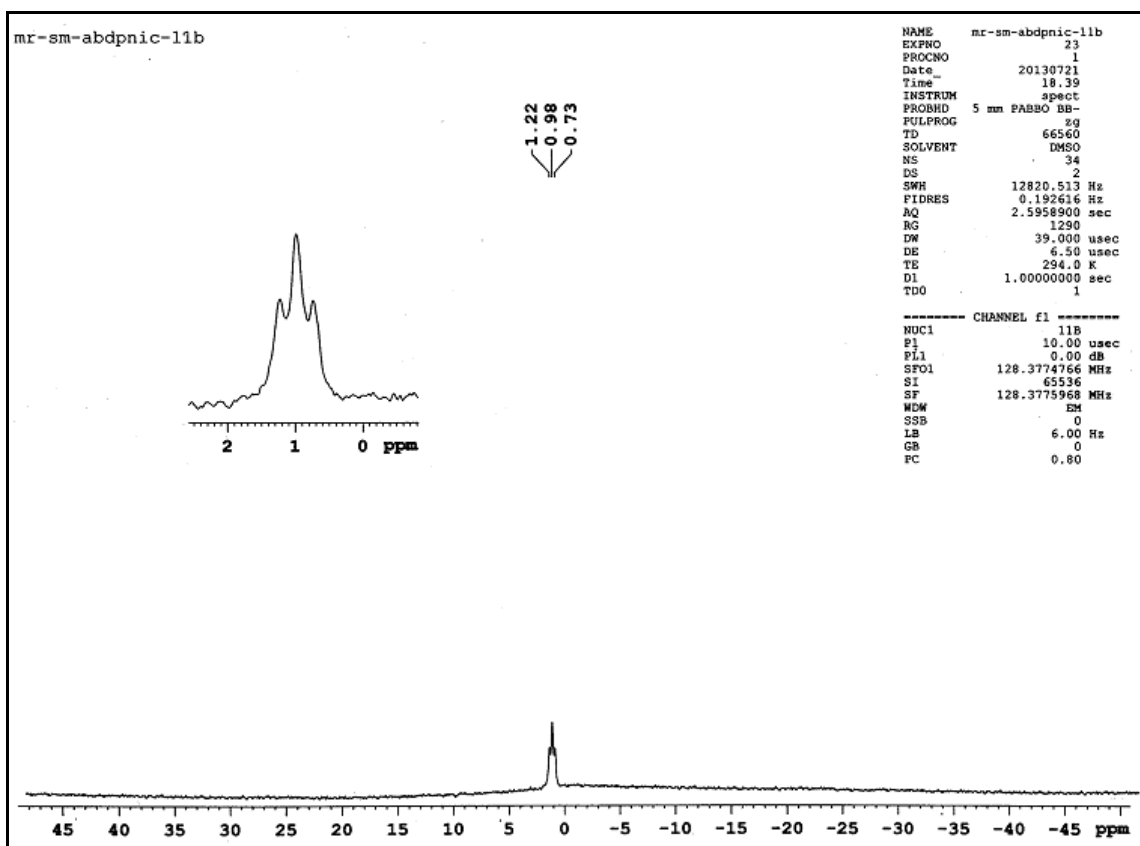

**Figure S4:**  $^{11}\text{B}$  NMR spectrum of compound **1** recorded in DMSO- $d_6$ . Inset shows the expansion

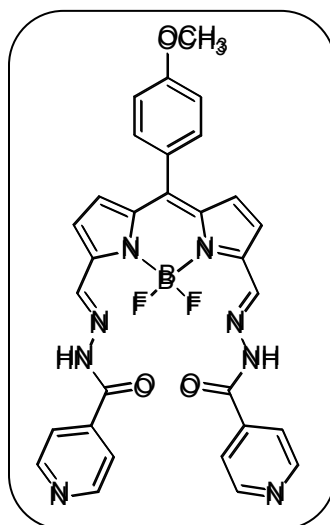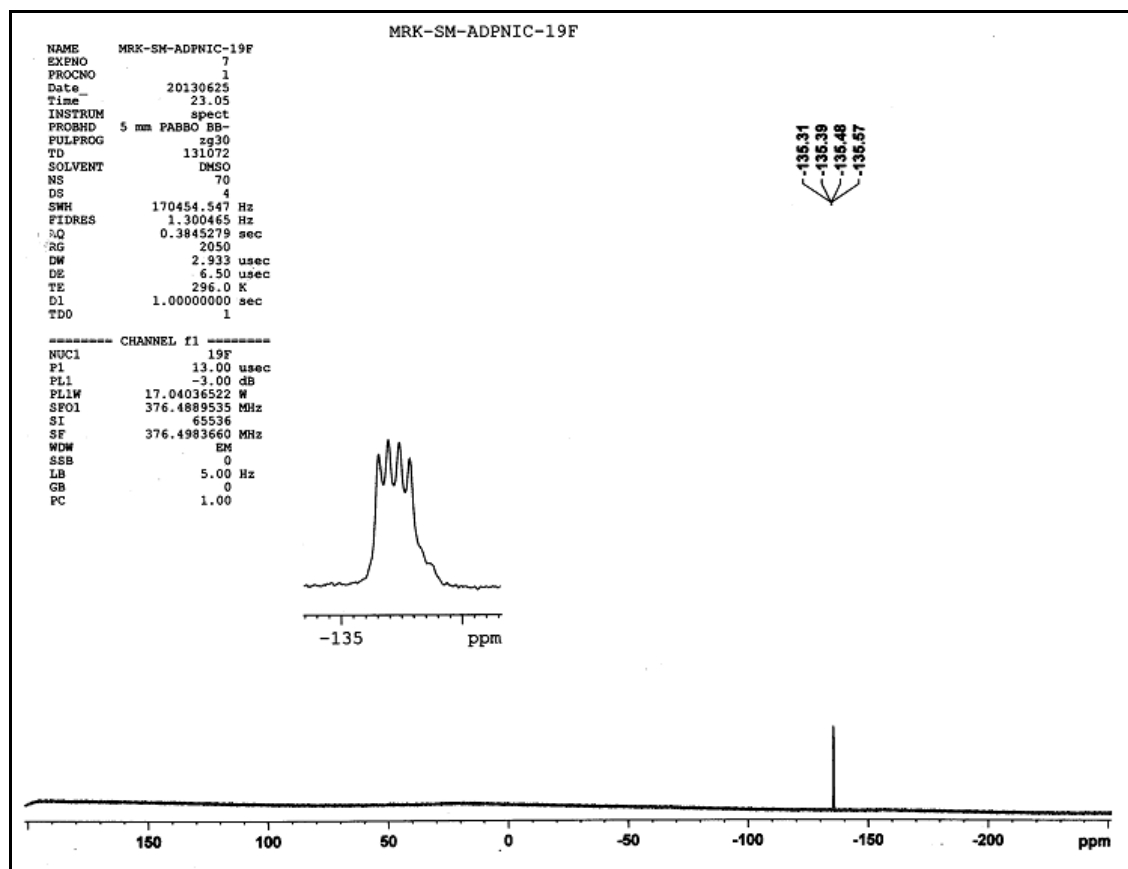

**Figure S5:**  $^{19}\text{F}$  NMR spectrum of compound **1** recorded in  $\text{DMSO-d}_6$ . Inset shows the expansion

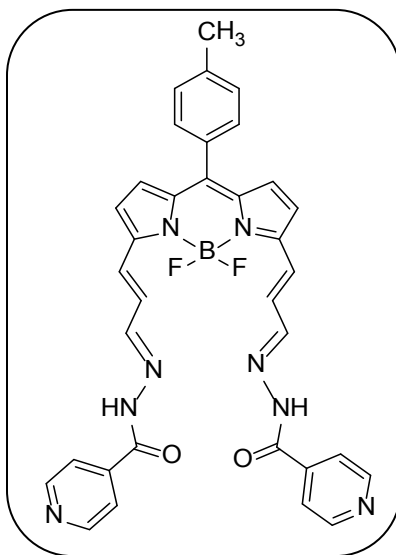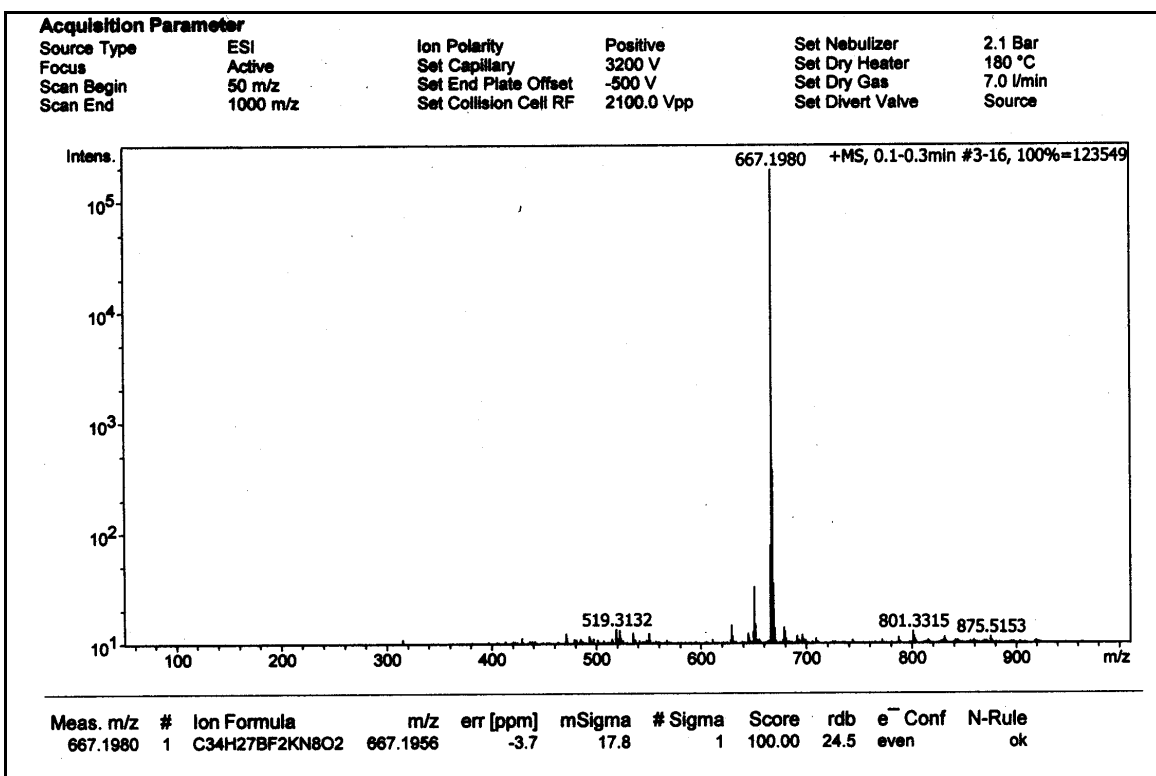

Figure S6: HRMS spectrum of compound 2



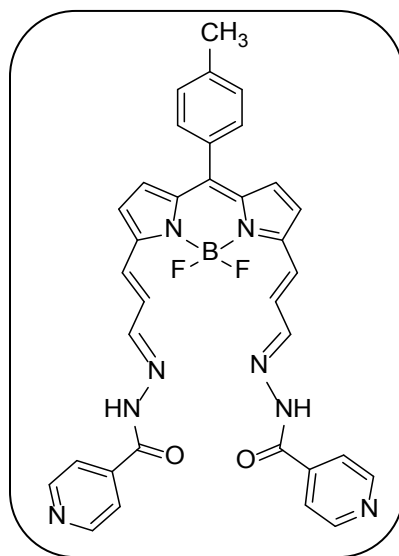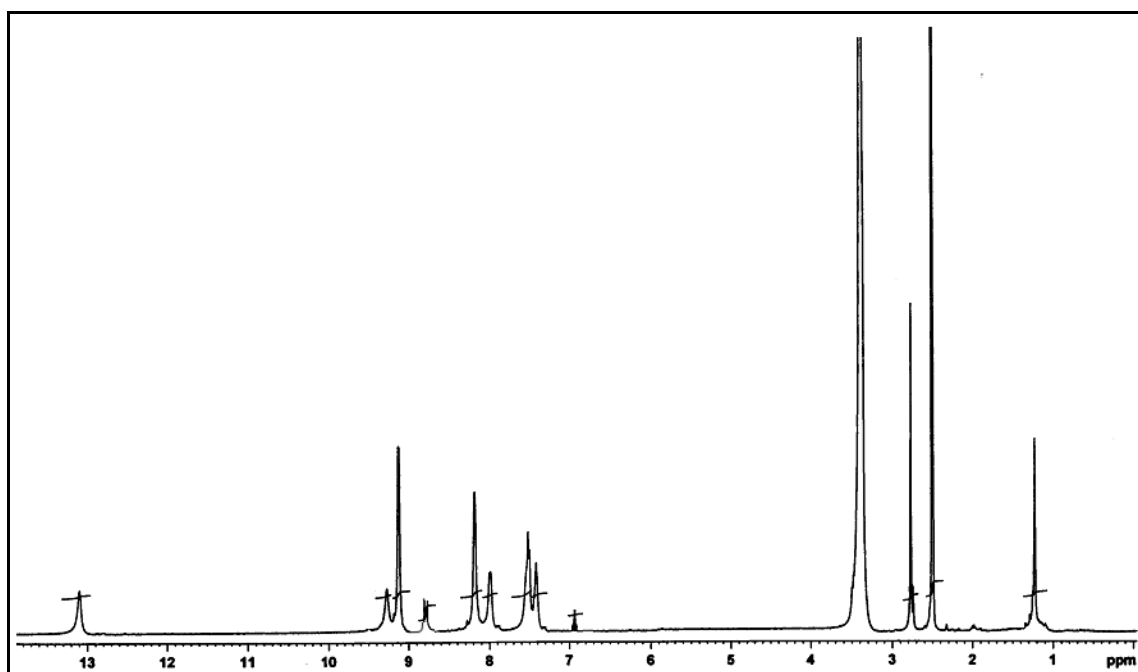

Figure S7: <sup>1</sup>H NMR spectrum of compound 2 recorded in DMSO-d<sub>6</sub>

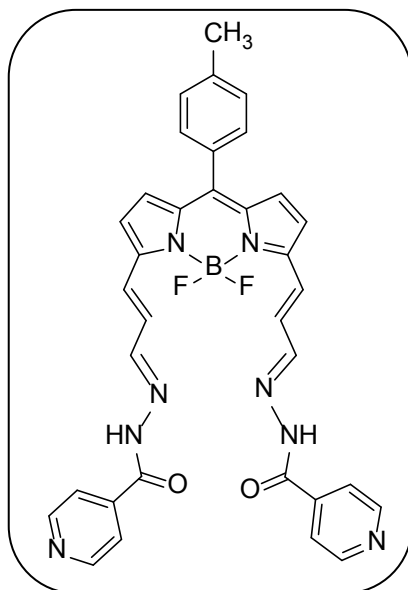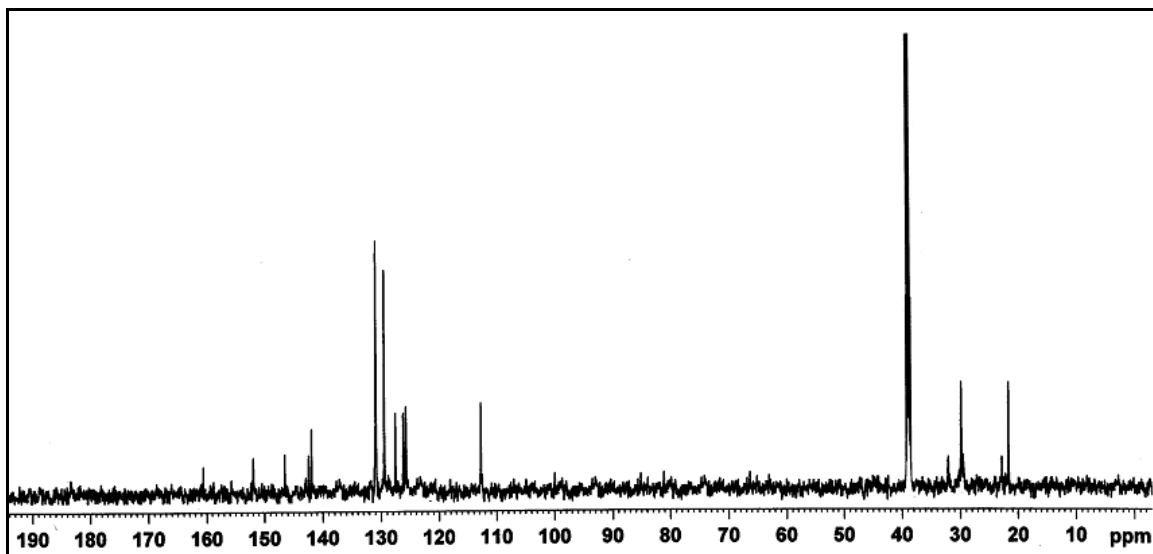

**Figure S8:** <sup>13</sup>C NMR spectrum of compound **2** recorded in DMSO-d<sub>6</sub>

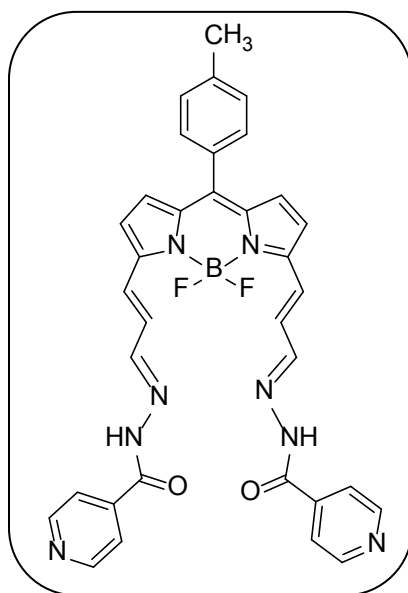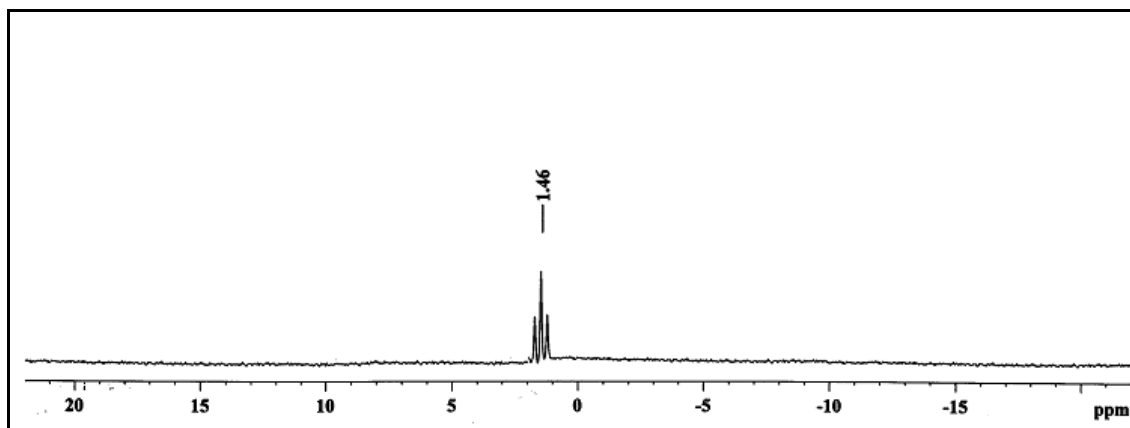

**Figure S9:** <sup>11</sup>B NMR spectrum of compound **2** recorded in DMSO-d<sub>6</sub>. Inset shows the expansion

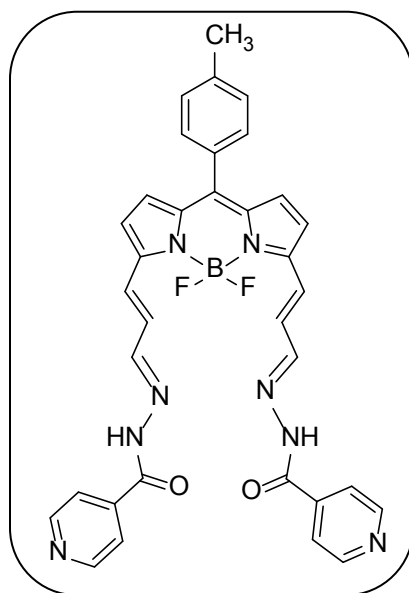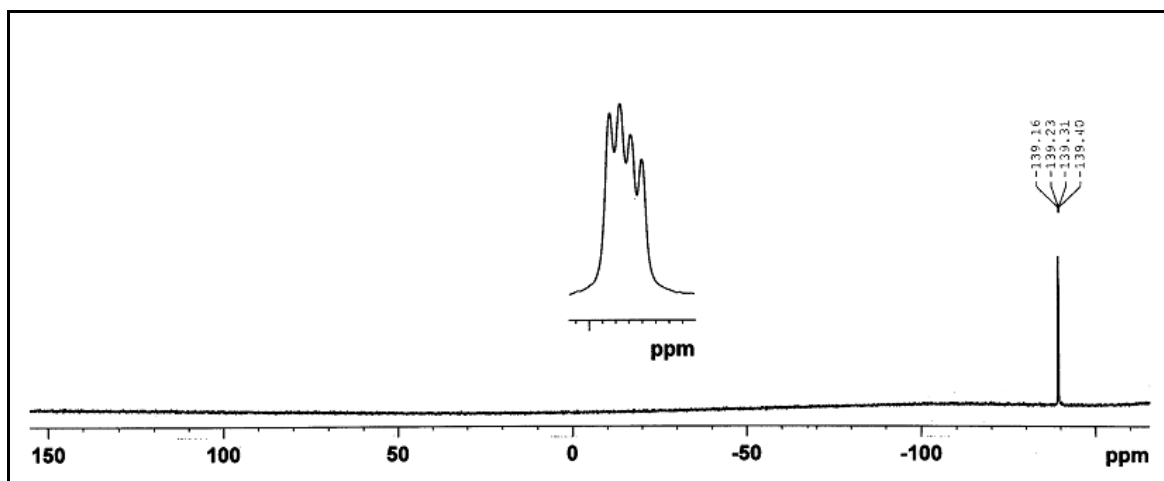

**Figure S10:** <sup>19</sup>F NMR spectrum of compound **2** recorded in DMSO-d<sub>6</sub>. Inset shows the expansion

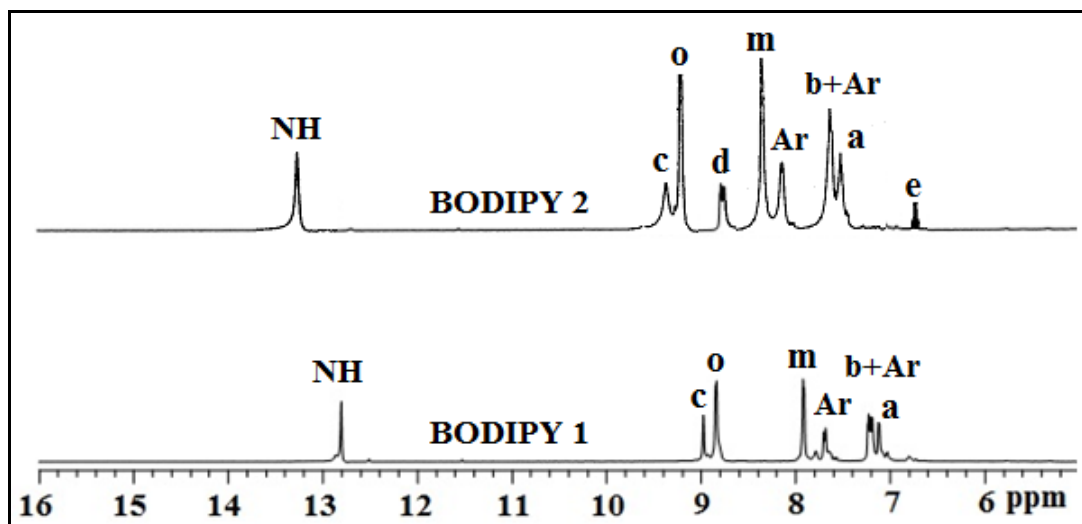

**Figure S11:** Comparison of the partial <sup>1</sup>H NMR spectra of BODIPYs **1** and **2** (16 mM) recorded in DMSO-d<sub>6</sub>

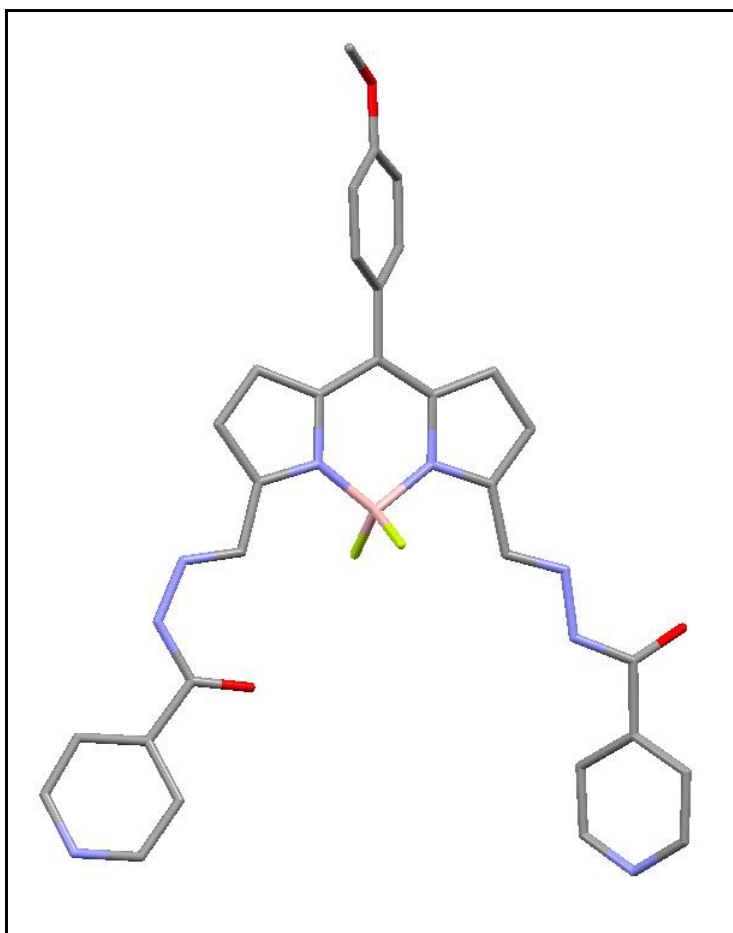

**Figure S12:** Crystal structure of BODIPY 1. Hydrogen atoms and solvent molecules are omitted for clarity.

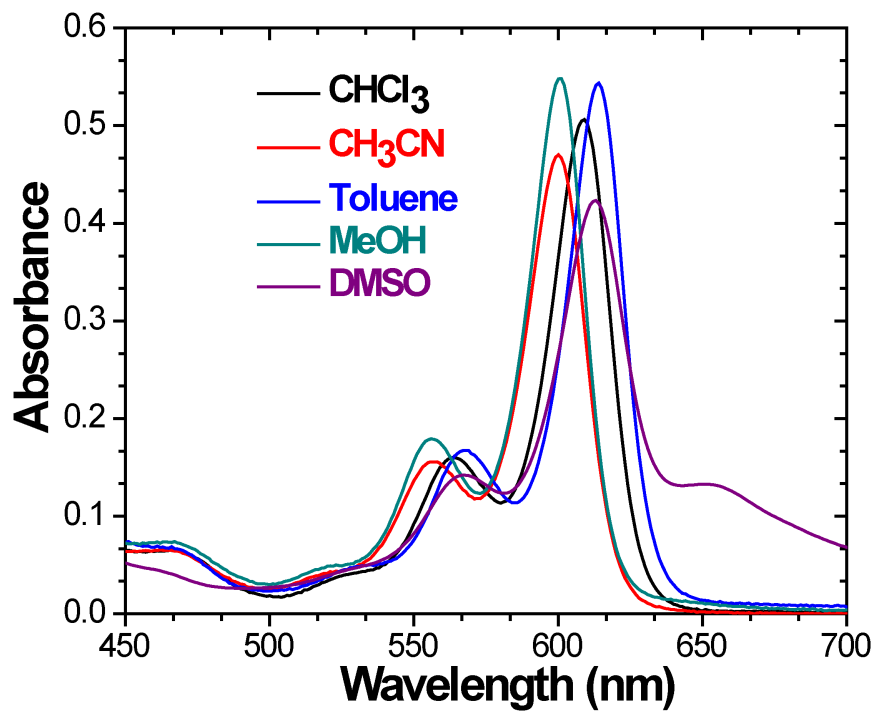

**Figure S13:** Absorption spectra of compound **1** (5 μM) recorded in different solvents

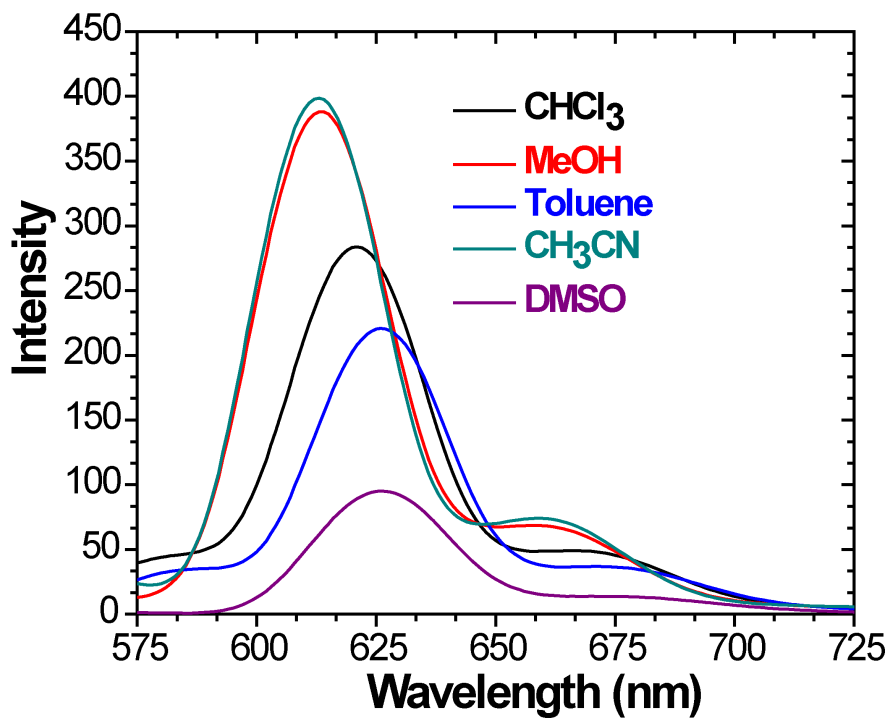

**Figure S14:** Emission spectra of compound **1** (5 μM) recorded in different solvents



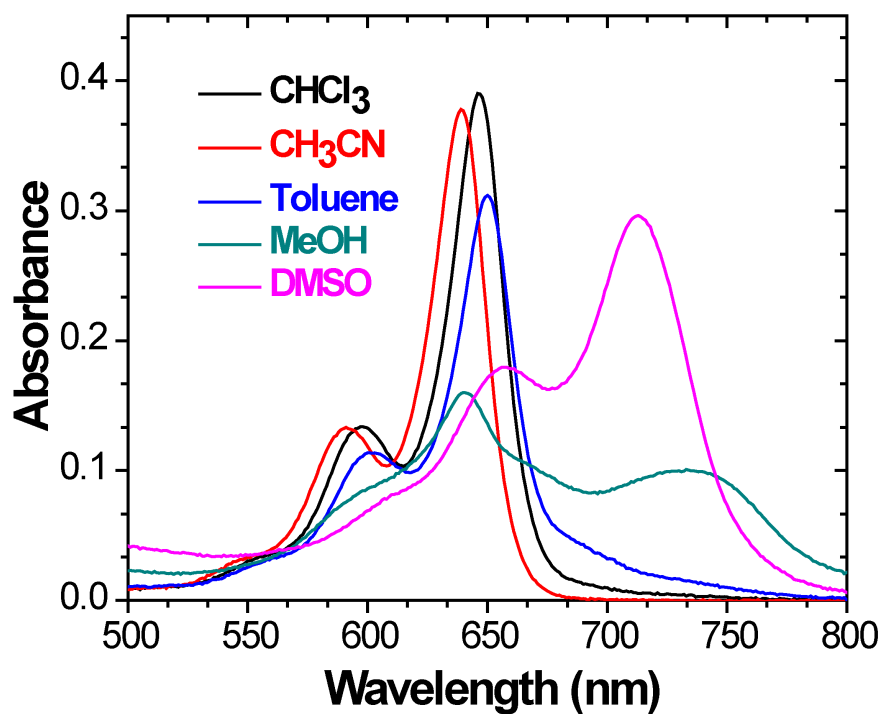

**Figure S15:** Absorption spectra of compound 2 (5 μM) recorded in different solvents

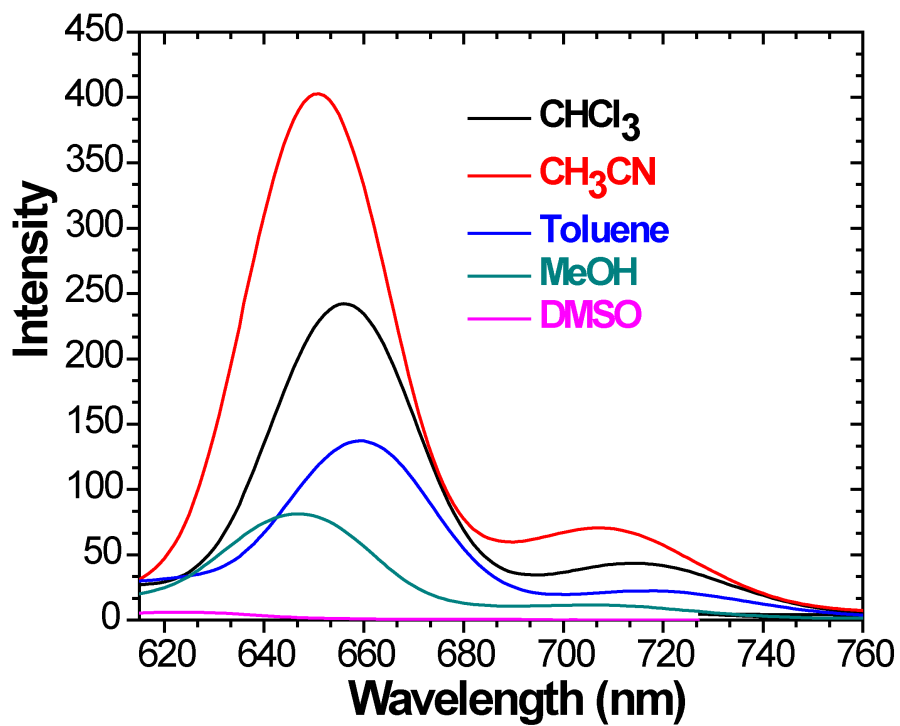

**Figure S16:** Emission spectra of compound 2 (5 μM) recorded in different solvents

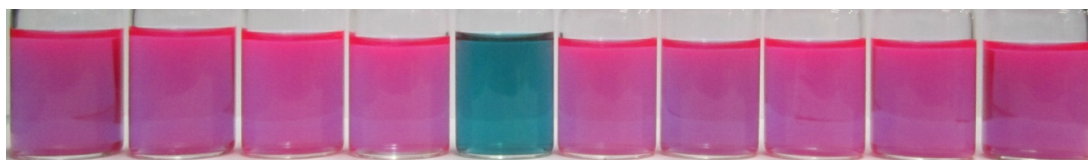

**Figure S17:** Color change induced upon addition of various (excess equivalents of perchlorate salts) metal ions to BODIPY **1** ( $5 \times 10^{-6}$  M) in  $\text{CH}_3\text{CN}/\text{PBS}$  (7:3; v/v, pH 7.4) under daylight: From left to right: (1) no metal ion, (2)  $\text{Na}^+$ , (3)  $\text{K}^+$ , (4)  $\text{Mn}^{2+}$ , (5)  $\text{Hg}^{2+}$ , (6)  $\text{Fe}^{2+}$ , (7)  $\text{Co}^{2+}$ , (8)  $\text{Ni}^{2+}$ , (9)  $\text{Cu}^{2+}$  and (10)  $\text{Zn}^{2+}$  respectively.

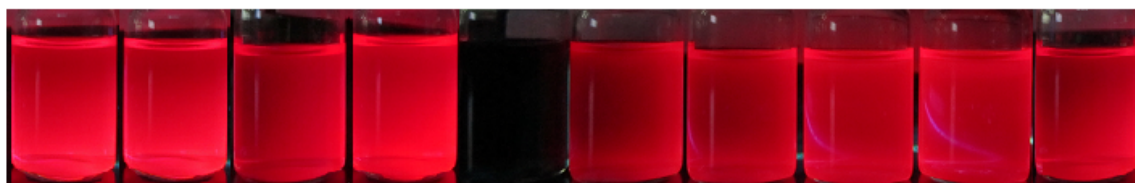

**Figure S18:** Color change induced upon addition of various (excess equivalents of perchlorate salts) metal ions to BODIPY **1** ( $5 \times 10^{-6}$  M) in  $\text{CH}_3\text{CN}/\text{PBS}$  (7:3; v/v, pH 7.4) under UV lamp: From left to right: (1) no metal ion, (2)  $\text{Na}^+$ , (3)  $\text{K}^+$ , (4)  $\text{Mn}^{2+}$ , (5)  $\text{Hg}^{2+}$ , (6)  $\text{Fe}^{2+}$ , (7)  $\text{Co}^{2+}$ , (8)  $\text{Ni}^{2+}$ , (9)  $\text{Cu}^{2+}$  and (10)  $\text{Zn}^{2+}$  respectively.

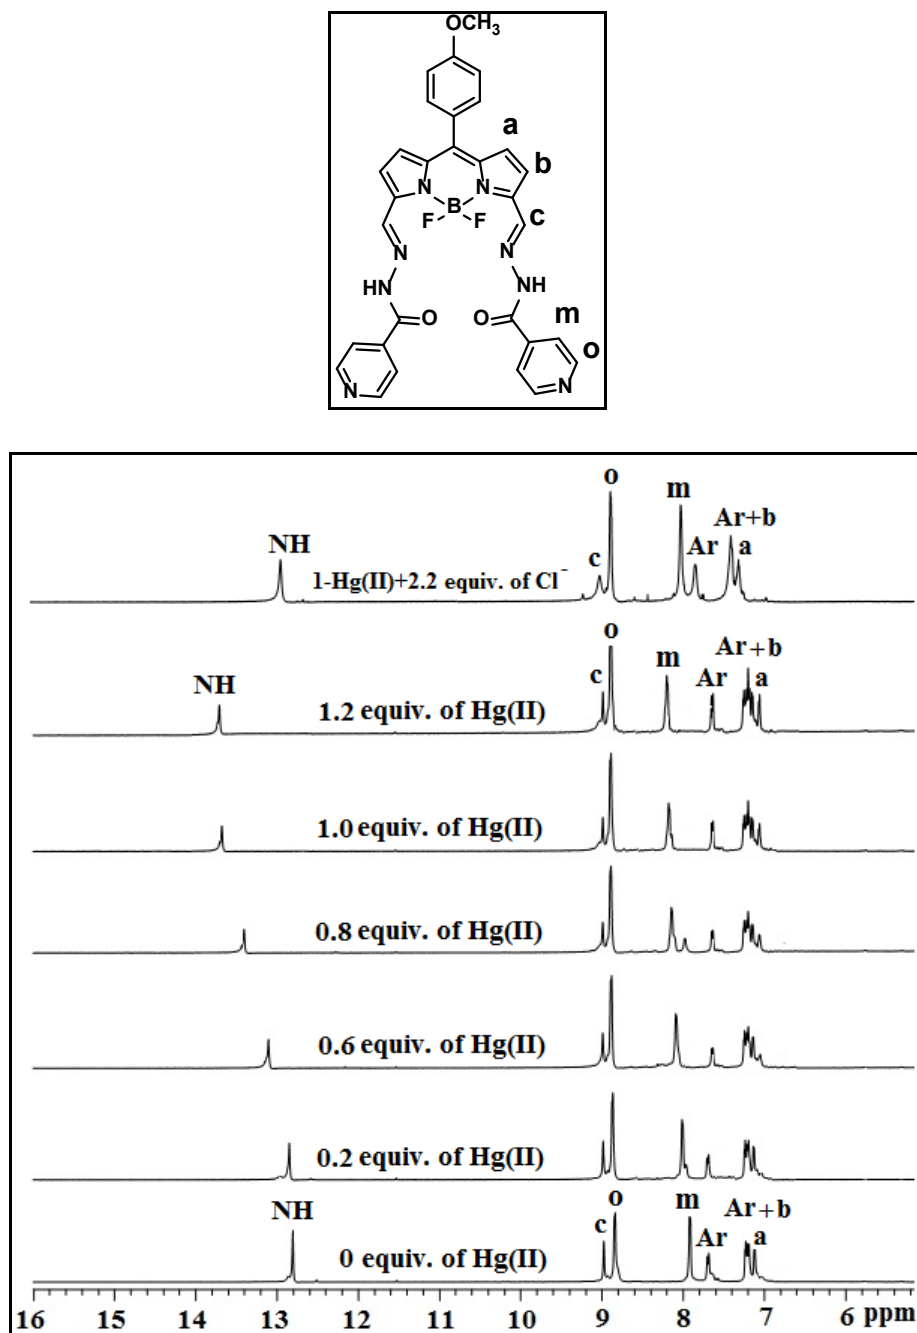

**Figure S19:** Partial <sup>1</sup>H NMR spectra of BODIPY 1 (16 mM) in the presence of increasing concentrations of Hg<sup>2+</sup> ions (0-1.2 equiv.) recorded in CD<sub>3</sub>CN/D<sub>2</sub>O. Top: Partial <sup>1</sup>H NMR spectra of BODIPY 1-Hg(II) complex (16 mM) obtained upon addition of Cl<sup>-</sup> (TBACl) ion (2.2 equiv.) recorded in CD<sub>3</sub>CN/D<sub>2</sub>O which is matching with the spectra of BODIPY 1 in absence of Hg<sup>2+</sup> ion.

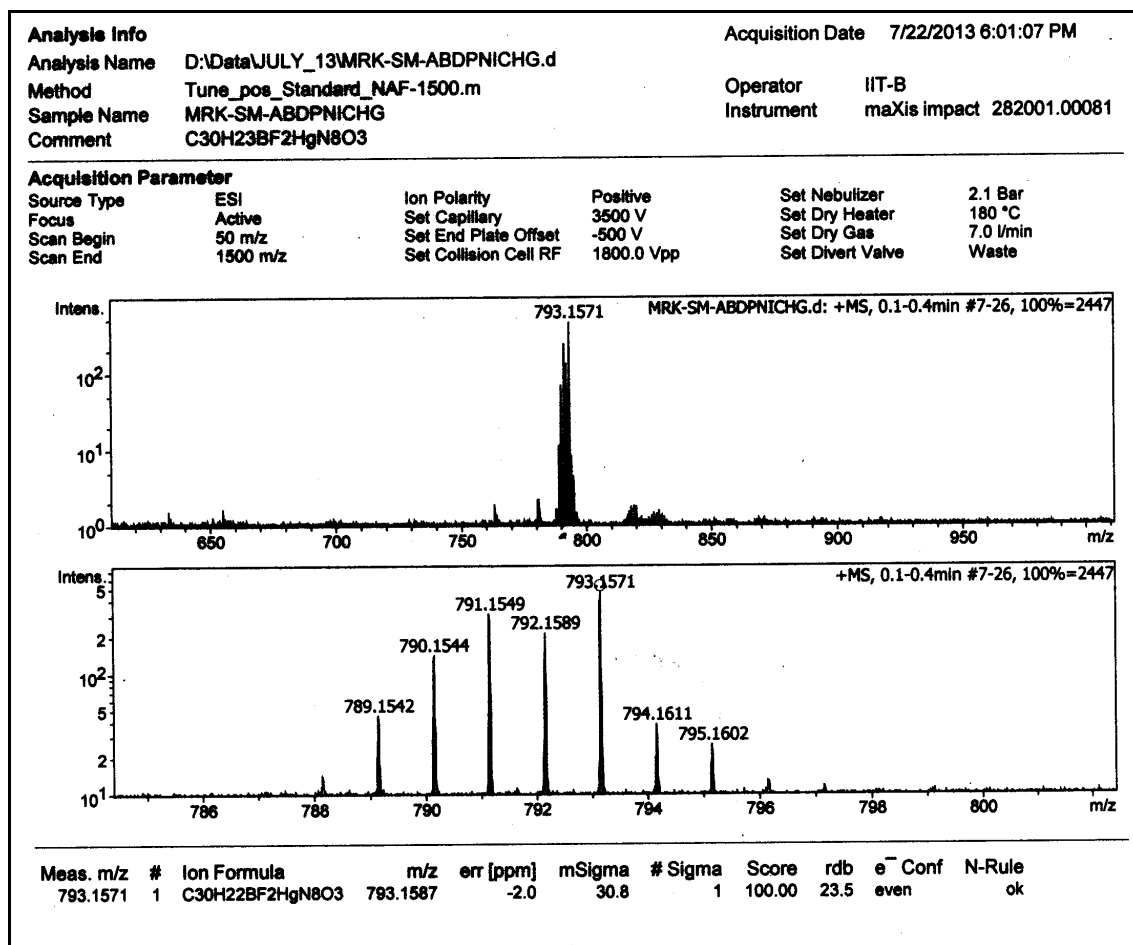

**Figure S20:** HR-MS spectrum showing the molecular ion peak for the 1:1 complex formed between compound **1** and Hg<sup>2+</sup> ion during titration (top) and expansion of the molecular ion peak (down).

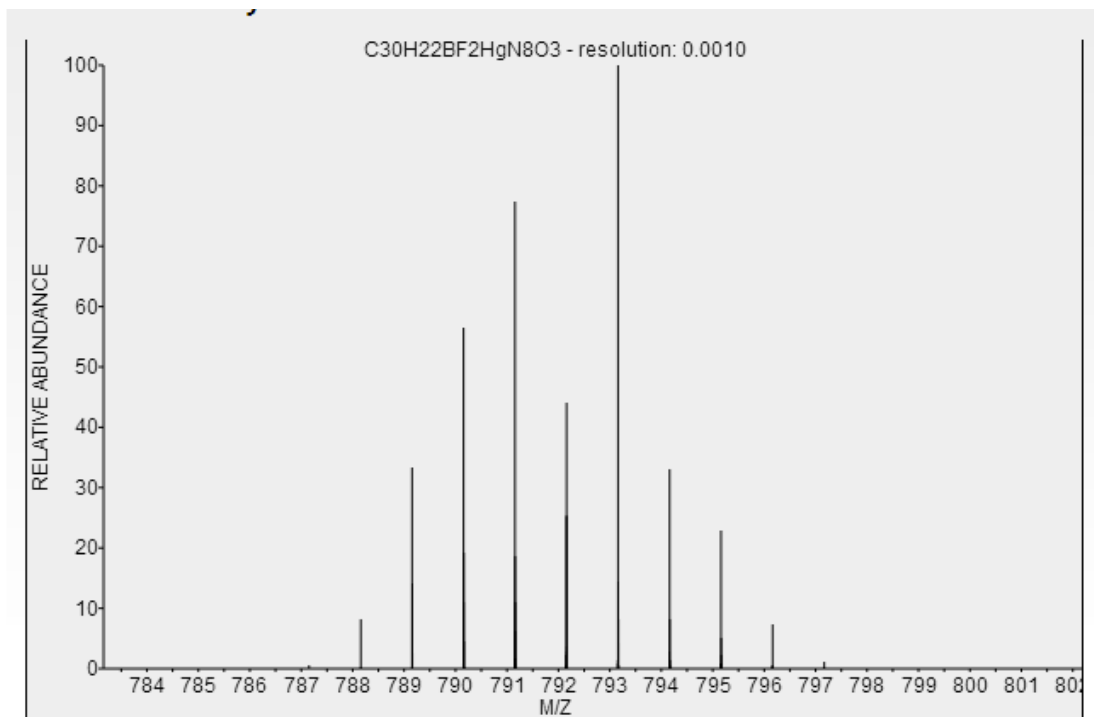

**Figure S21:** The calculated isotopic peak pattern for the 1:1 complex formed between BODIPY **1** and Hg<sup>+2</sup> ions.

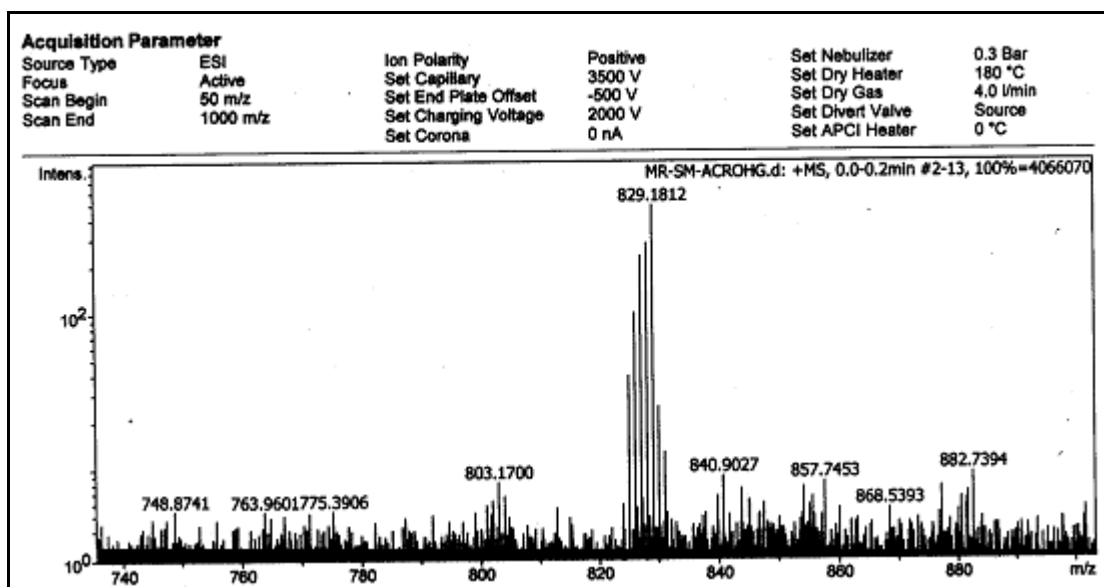

**Figure S22:** ESI mass spectrum showing the molecular ion peak for the 1:1 complex formed between BODIPY 2 and  $\text{Hg}^{+2}$  ions during titration.

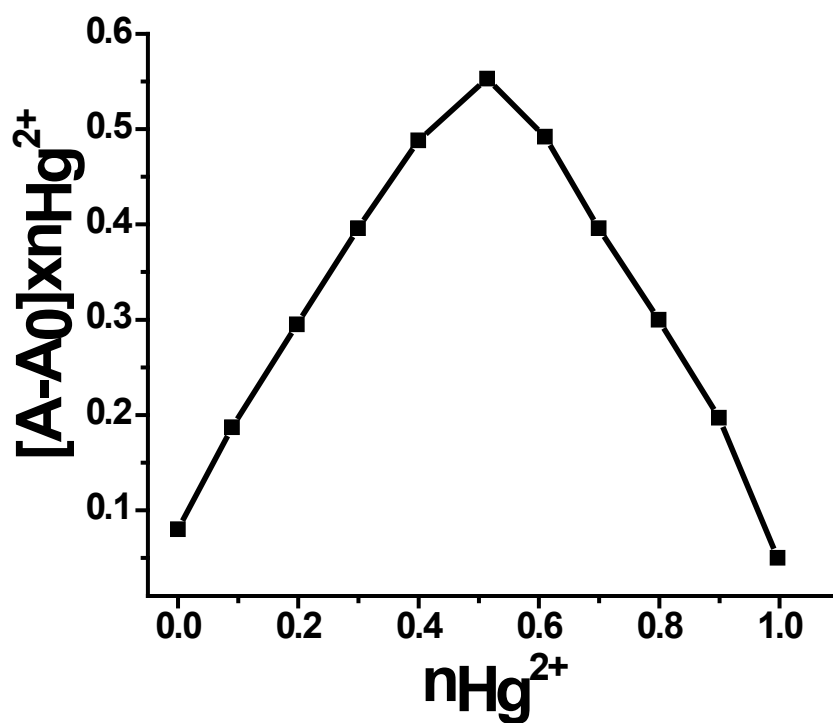

**Figure S23.** Job's plot for the evolution of binding stoichiometry between BODIPY **1** and  $\text{Hg}^{2+}$  in  $\text{CH}_3\text{CN}/\text{PBS}$  (7:3; v/v, pH 7.4) solution. Where  $n_{\text{Hg}^{2+}}$  is mole fraction of the  $\text{Hg}^{2+}$  ion added and  $A$  is absorbance of compound **1** in the presence of  $\text{Hg}^{2+}$  and  $A_0$  is the absorbance of compound **1** in the absence of  $\text{Hg}^{2+}$  which forms 1:1 complex. The total  $[\text{compound } \mathbf{1}] + [\text{Hg}^{2+}] = 1.0 \times 10^{-4} \text{ M}$ .



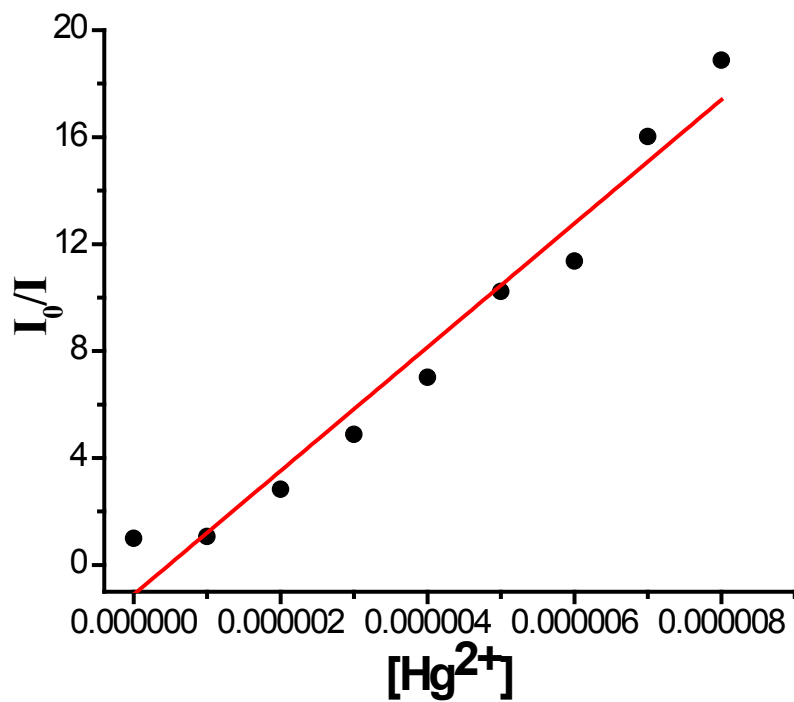

**Figure S24:** Determination of Stern-Volmer quenching constant for compound **1**- $Hg^{2+}$

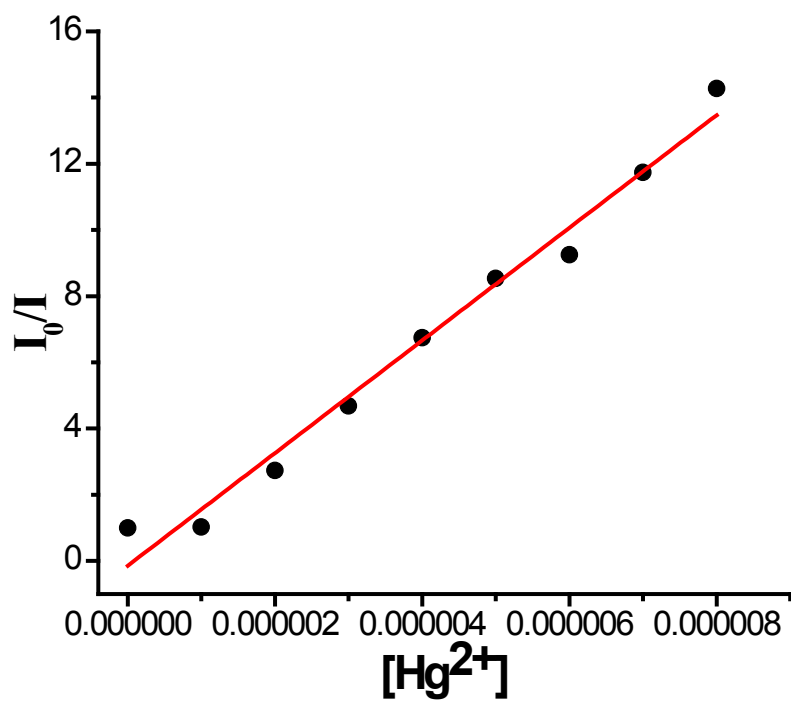

**Figure S25:** Determination of Stern-Volmer quenching constant for compound **2**- $Hg^{2+}$

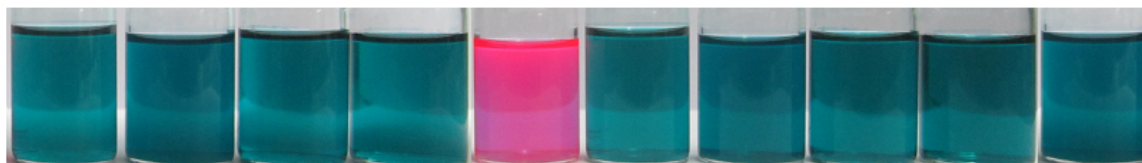

**Figure S26:** Color change induced upon addition of various (excess equivalents of  $\text{Bu}_4\text{N}^+$  salts) anions to BODIPY **1**- $\text{Hg}^{2+}$  complex ( $5 \times 10^{-6}$  M) in  $\text{CH}_3\text{CN}/\text{PBS}$  (7:3; v/v, pH 7.4) under daylight: From left to right: (1)  $\text{F}^-$ , (2)  $\text{CN}^-$ , (3)  $\text{N}_3^-$ , (4)  $\text{OH}^-$ , (5)  $\text{Cl}^-$ , (6)  $\text{Br}^-$ , (7)  $\text{I}^-$ , (8)  $\text{H}_2\text{PO}_4^-$ , (9)  $\text{HSO}_4^-$  and (10)  $\text{ClO}_4^-$  respectively.

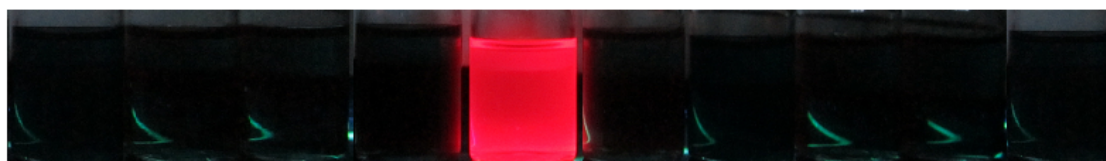

**Figure S27:** Color change induced upon addition of various (excess equivalents of  $\text{Bu}_4\text{N}^+$  salts) anions to BODIPY **1**- $\text{Hg}^{2+}$  complex ( $5 \times 10^{-6}$  M) in  $\text{CH}_3\text{CN}/\text{PBS}$  (7:3; v/v, pH 7.4) under UV lamp: From left to right: (1)  $\text{F}^-$ , (2)  $\text{CN}^-$ , (3)  $\text{N}_3^-$ , (4)  $\text{OH}^-$ , (5)  $\text{Cl}^-$ , (6)  $\text{Br}^-$ , (7)  $\text{I}^-$ , (8)  $\text{H}_2\text{PO}_4^-$ , (9)  $\text{HSO}_4^-$  and (10)  $\text{ClO}_4^-$  respectively.

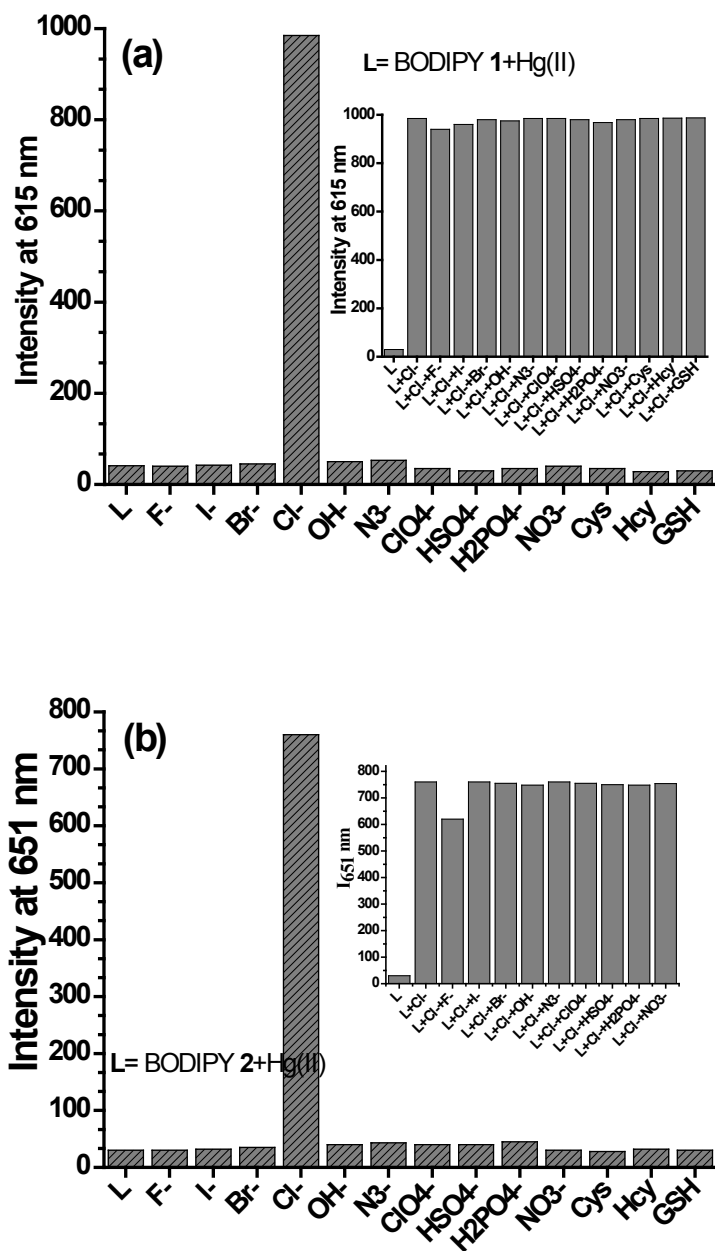

**Figure S28:** The histograms showing the fluorescence titration response of (a) **1**-Hg<sup>2+</sup> and (b) **2**-Hg<sup>2+</sup> in the presence of various anions; [BODIPYs **1,2**] = 5 μM; [A<sup>n-</sup>] = 20 μM]. The inset histograms showing the competitive fluorescence titration response of (a) **1**-Hg<sup>2+</sup> and (b) **2**-Hg<sup>2+</sup> in the presence of different anions; {[**1**+Hg<sup>2+</sup>, **2**+Hg<sup>2+</sup>] + A<sup>n-</sup>}; [**1, 2**] = 5 μM, [Cl<sup>-</sup>] = 20 μM, [A<sup>-</sup>] = 30 μM.

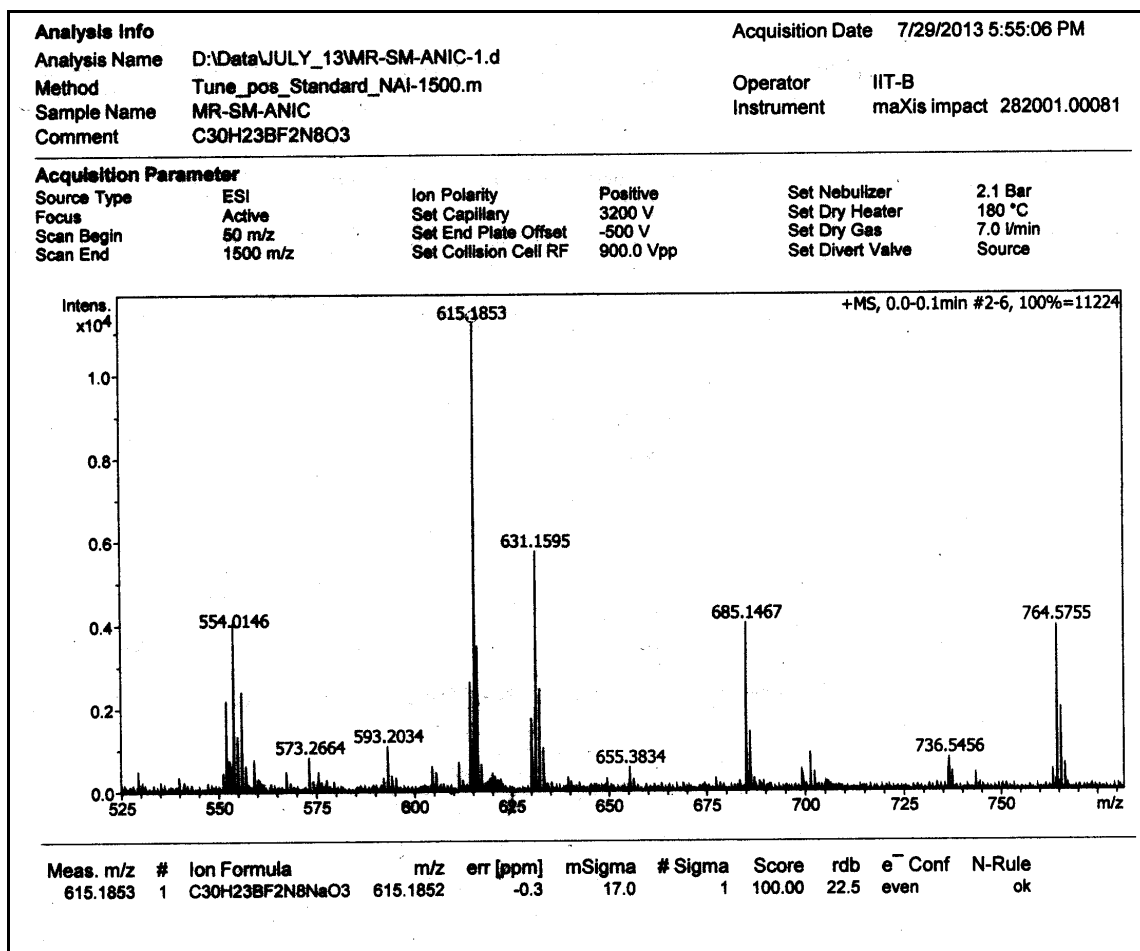

**Figure S29:** HR-MS spectrum showing the molecular ion peak for the formation of compound **1** during titration of BODIPY **1**-Hg<sup>2+</sup> complex with Cl<sup>-</sup> ion.

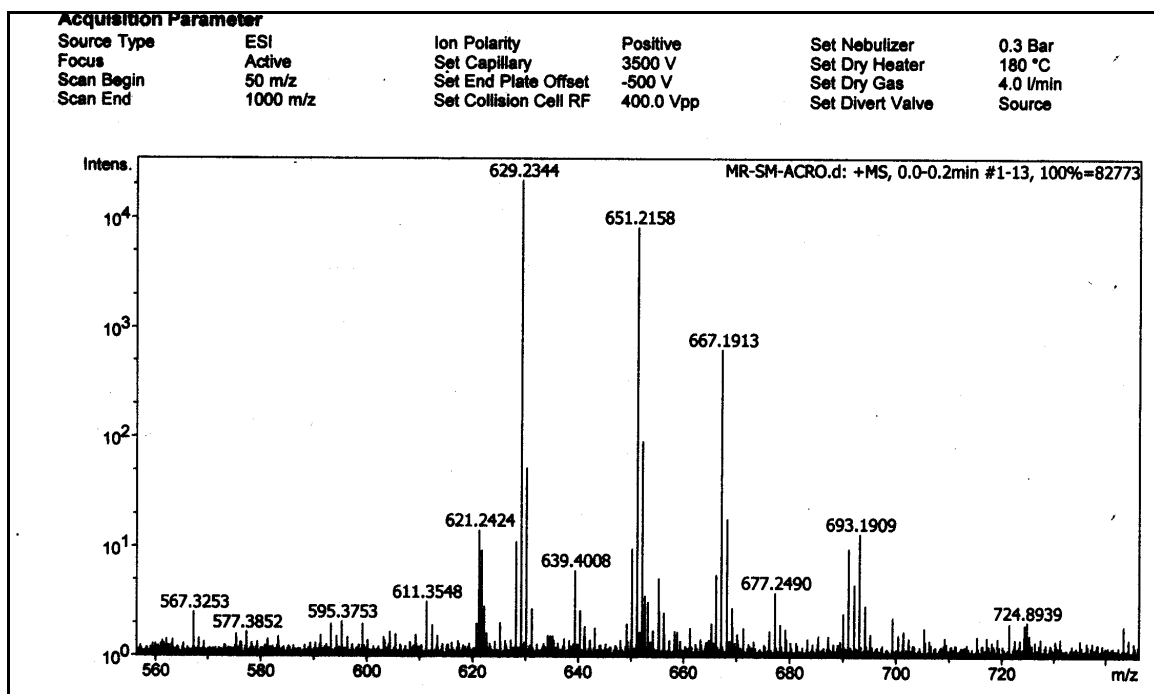

**Figure S30:** HR-MS spectrum showing the molecular ion peak for the formation of compound **2** during titration of **2**-Hg<sup>2+</sup> complex with Cl<sup>-</sup> ion.

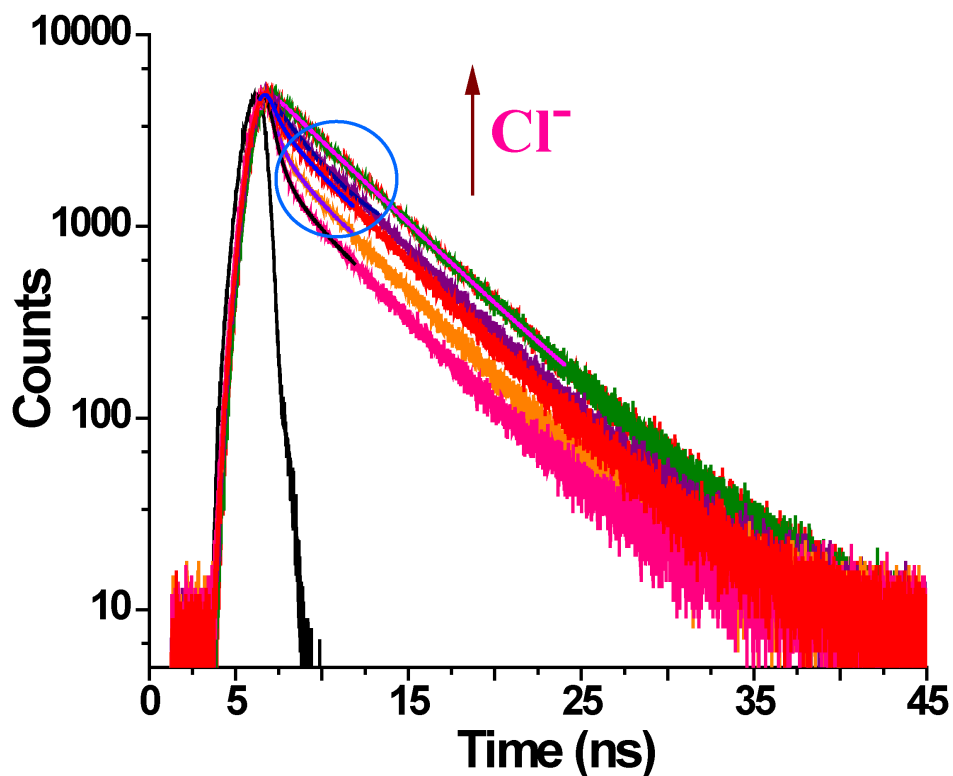

**Figure S31:** Time-resolved luminescence decay profiles of BODIPY 1-Hg<sup>2+</sup> complex (5  $\mu$ M) in CH<sub>3</sub>CN/PBS (7:3; v/v, pH 7.4) solution upon titration with different concentrations of Cl<sup>-</sup> ions (TBACl). The excitation wavelength used was 540 nm and emission was detected at the emission-peak maxima (615 nm) of BODIPY 1-Hg<sup>2+</sup> in chloroform.

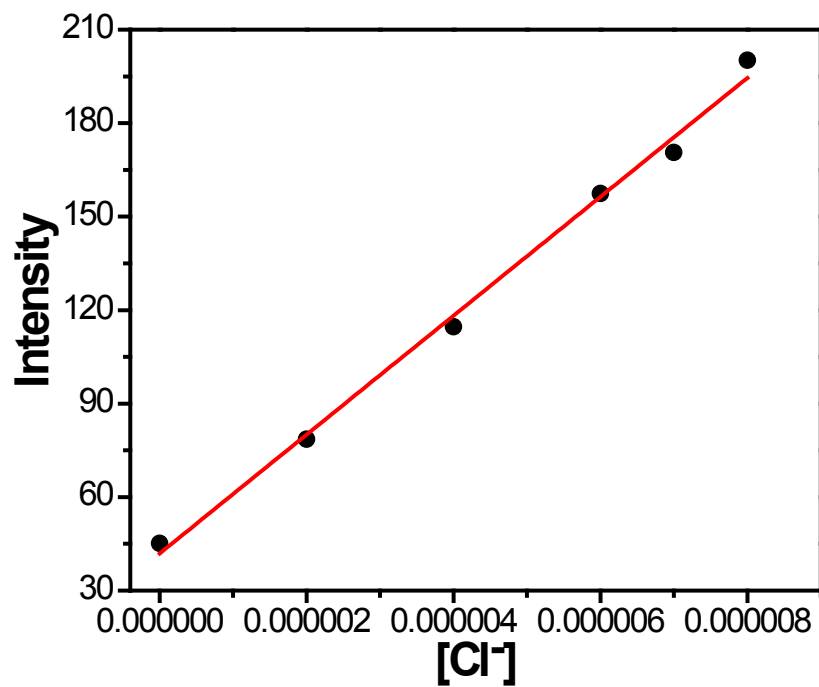

**Figure S32:** (a) The linear dynamic fluorescence response for the titration of BODIPY 1- $\text{Hg}^{2+}$  complex with  $\text{Cl}^-$  to determine the detection limit (LOD). The LOD was calculated using the formula  $3\sigma/k$ , where  $\sigma$  = standard deviation of blank (10 samples) and  $k$  = is the slope of linear calibration curve.



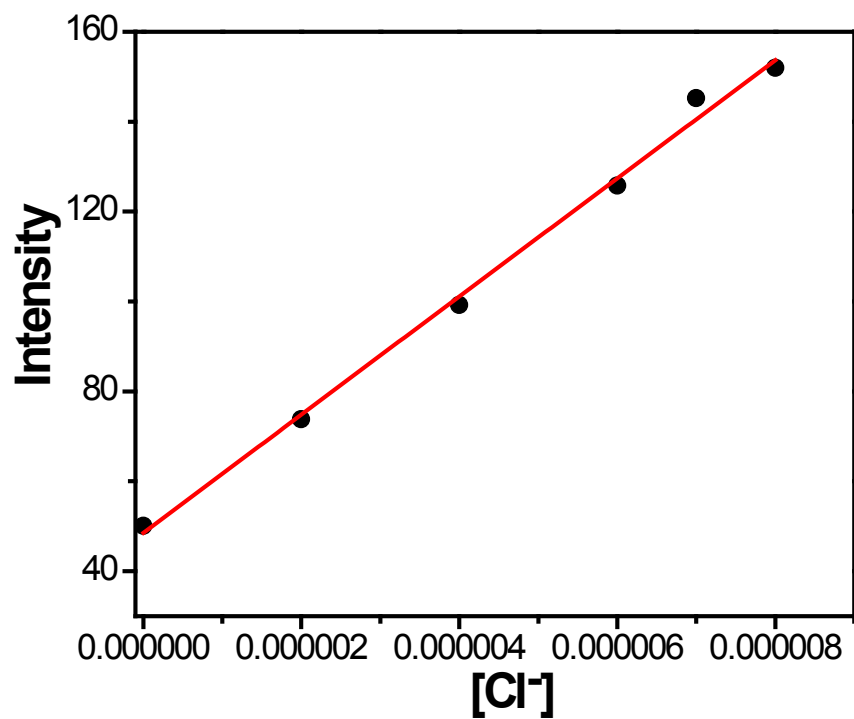

**Figure S33:** (a) The linear dynamic fluorescence response for the titration of BODIPY 2- $\text{Hg}^{2+}$  complex with  $\text{Cl}^-$  to determine the detection limit (LOD). The LOD was calculated using the formula  $3\sigma/k$ , where  $\sigma$  = standard deviation of blank (10 samples) and  $k$  = is the slope of linear calibration curve.

**Table S1:** Electrochemical data of BODIPYs **1-4** recorded in acetonitrile containing 0.1M TBAP as supporting electrolyte

| Compound | $E_{\text{red}}(\text{V})$<br>I | $E_{\text{red}}(\text{V})$<br>II |
|----------|---------------------------------|----------------------------------|
| <b>1</b> | -0.514                          | -0.897                           |
| <b>2</b> | -0.561                          | -0.875                           |
| <b>3</b> | -0.148                          | -1.055                           |
| <b>4</b> | -0.342                          | -0.946                           |
